# Supplementary material for: Magnetism and Grain-Size Distribution of Particles Deposited on the Surface of Urban Trees in Lanzhou City, Northwestern China
Source: MDPI journal article supplement (doi:10.3390/ijerph182211964), 2021-11-14
Supplement: s1 [file s1]

**Table S1.** Descriptive statistics for SIRM, PM weight and grain-size distribution of particles deposited on the surface of needles

| Samples                       | SIRM<br>$\times 10^{-5}\text{Am}^2\cdot\text{kg}^{-1}$ | Weight<br>$\text{g}\cdot\text{kg}^{-1}$ | Particle size           |                          |                           |                        |
|-------------------------------|--------------------------------------------------------|-----------------------------------------|-------------------------|--------------------------|---------------------------|------------------------|
|                               |                                                        |                                         | 0.02-1 $\mu\text{m}/\%$ | 1-2.5 $\mu\text{m} / \%$ | 2.5-10 $\mu\text{m} / \%$ | >10 $\mu\text{m} / \%$ |
| <i>All sample(n=480)</i>      |                                                        |                                         |                         |                          |                           |                        |
| min                           | 2.08                                                   | 0.56                                    | 2.33                    | 3.26                     | 16.13                     | 50.07                  |
| max                           | 659.49                                                 | 67.69                                   | 6.44                    | 8.26                     | 37.44                     | 77.88                  |
| mean                          | 89.37                                                  | 14.34                                   | 4.19                    | 6.09                     | 27.17                     | 62.54                  |
| s.d                           | 68.89                                                  | 8.17                                    | 0.66                    | 0.80                     | 2.99                      | 3.81                   |
| <i>T0 (height:120-600 cm)</i> |                                                        |                                         |                         |                          |                           |                        |
| min                           | 25.92                                                  | 4.62                                    | 2.73                    | 3.26                     | 20.14                     | 57.10                  |
| max                           | 659.49                                                 | 67.69                                   | 5.00                    | 7.48                     | 33.29                     | 73.79                  |
| mean                          | 142.50                                                 | 16.87                                   | 3.67                    | 5.47                     | 27.58                     | 63.27                  |
| s.d                           | 118.07                                                 | 11.66                                   | 0.54                    | 0.70                     | 3.09                      | 3.65                   |
| <i>T1 (height:100-540 cm)</i> |                                                        |                                         |                         |                          |                           |                        |
| min                           | 27.61                                                  | 4.04                                    | 2.84                    | 3.95                     | 21.25                     | 50.07                  |
| max                           | 314.46                                                 | 49.25                                   | 6.44                    | 8.17                     | 37.44                     | 71.96                  |
| mean                          | 92.67                                                  | 14.94                                   | 4.56                    | 6.60                     | 28.84                     | 60.01                  |
| s.d                           | 54.96                                                  | 8.81                                    | 0.68                    | 0.74                     | 2.35                      | 3.30                   |
| <i>T2 (height:100-560 cm)</i> |                                                        |                                         |                         |                          |                           |                        |
| min                           | 29.12                                                  | 7.09                                    | 2.71                    | 4.16                     | 17.03                     | 54.50                  |
| max                           | 183.77                                                 | 37.77                                   | 6.10                    | 8.26                     | 32.01                     | 75.65                  |
| mean                          | 86.62                                                  | 16.03                                   | 4.42                    | 6.28                     | 26.07                     | 63.22                  |
| s.d                           | 28.98                                                  | 5.50                                    | 0.59                    | 0.71                     | 2.71                      | 3.52                   |
| <i>T3 (height:100-560 cm)</i> |                                                        |                                         |                         |                          |                           |                        |
| min                           | 6.63                                                   | 3.44                                    | 2.55                    | 4.17                     | 17.77                     | 56.61                  |
| max                           | 158.38                                                 | 35.49                                   | 5.16                    | 7.31                     | 32.81                     | 74.79                  |
| mean                          | 68.68                                                  | 12.68                                   | 4.16                    | 6.00                     | 26.03                     | 63.81                  |
| s.d                           | 27.66                                                  | 5.95                                    | 0.55                    | 0.67                     | 2.96                      | 3.68                   |
| <i>T4 (height:100-560 cm)</i> |                                                        |                                         |                         |                          |                           |                        |
| min                           | 2.08                                                   | 0.56                                    | 2.33                    | 3.66                     | 16.13                     | 57.05                  |
| max                           | 197.54                                                 | 40.32                                   | 5.14                    | 7.30                     | 32.76                     | 77.88                  |
| mean                          | 55.76                                                  | 11.36                                   | 4.19                    | 6.12                     | 27.36                     | 62.33                  |
| s.d                           | 32.69                                                  | 6.33                                    | 0.60                    | 0.69                     | 2.82                      | 3.64                   |

**Table S2.** results of one-way ANOVA performed of every four sampling directions (NE, SW, NW and SE) at sites T0-T4. Statistically significant differences ( $p < 0.05$ ) are highlighted in bold.

| dependent variable   | (I)direction | (J)direction | T0           | T1                | T2                | T3           | T4                |
|----------------------|--------------|--------------|--------------|-------------------|-------------------|--------------|-------------------|
| SIRM                 | NE           | NW           | 0.183        | <b>0.060</b>      | 0.501             | 0.991        | <b>&lt;0.0001</b> |
|                      |              | SE           | 0.022        | <b>&lt;0.0001</b> | <b>&lt;0.0001</b> | <b>0.001</b> | <b>0.227</b>      |
|                      |              | SW           | 0.001        | <b>&lt;0.0001</b> | <b>&lt;0.0001</b> | <b>0.516</b> | <b>&lt;0.0001</b> |
|                      | NW           | NW           | 0.183        | 0.060             | 0.501             | 0.991        | <b>&lt;0.0001</b> |
|                      |              | SE           | 0.322        | <b>0.001</b>      | <b>0.002</b>      | <b>0.001</b> | <b>0.004</b>      |
|                      |              | SW           | 0.050        | <b>&lt;0.0001</b> | <b>&lt;0.0001</b> | 0.509        | 0.259             |
|                      | SE           | NE           | <b>0.022</b> | <b>&lt;0.0001</b> | <b>&lt;0.0001</b> | <b>0.001</b> | 0.227             |
|                      |              | NW           | 0.322        | <b>0.001</b>      | <b>0.002</b>      | <b>0.001</b> | <b>0.004</b>      |
|                      |              | SW           | 0.324        | 0.435             | 0.690             | <b>0.007</b> | <b>&lt;0.0001</b> |
|                      | SW           | NE           | <b>0.001</b> | <b>&lt;0.0001</b> | <b>&lt;0.0001</b> | 0.516        | <b>&lt;0.0001</b> |
|                      |              | NW           | 0.050        | <b>&lt;0.0001</b> | <b>&lt;0.0001</b> | 0.509        | 0.259             |
|                      |              | SE           | 0.324        | 0.435             | 0.690             | <b>0.007</b> | <b>&lt;0.0001</b> |
| weight               | NE           | NW           | 0.506        | <b>0.044</b>      | 0.914             | 0.340        | <b>0.073</b>      |
|                      |              | SE           | 0.648        | <b>&lt;0.0001</b> | <b>0.015</b>      | 0.068        | 0.476             |
|                      |              | SW           | 0.222        | <b>&lt;0.0001</b> | <b>0.002</b>      | 0.856        | <b>0.016</b>      |
|                      | NW           | NW           | 0.506        | <b>0.044</b>      | 0.914             | 0.340        | <b>0.073</b>      |
|                      |              | SE           | 0.263        | <b>0.007</b>      | <b>0.020</b>      | <b>0.006</b> | 0.275             |
|                      |              | SW           | <b>0.061</b> | <b>0.028</b>      | <b>0.003</b>      | 0.257        | 0.529             |
|                      | SE           | NE           | 0.648        | <b>&lt;0.0001</b> | <b>0.015</b>      | 0.068        | 0.476             |
|                      |              | NW           | 0.263        | <b>0.007</b>      | <b>0.020</b>      | <b>0.006</b> | 0.275             |
|                      |              | SW           | 0.442        | 0.558             | 0.527             | 0.099        | 0.087             |
|                      | SW           | NE           | 0.222        | <b>&lt;0.0001</b> | <b>0.002</b>      | 0.856        | <b>0.016</b>      |
|                      |              | NW           | <b>0.061</b> | <b>0.028</b>      | <b>0.003</b>      | 0.257        | 0.529             |
|                      |              | SE           | 0.442        | 0.558             | 0.527             | <b>0.099</b> | 0.087             |
| 0.02-1 $\mu\text{m}$ | NE           | NW           | 0.199        | <b>0.003</b>      | <b>0.008</b>      | 0.819        | 0.782             |
|                      |              | SE           | 0.443        | <b>0.013</b>      | 0.762             | 0.624        | 0.926             |
|                      |              | SW           | 0.219        | <b>0.027</b>      | 0.274             | 0.818        | 0.748             |
|                      | NW           | NW           | 0.199        | <b>0.003</b>      | <b>0.008</b>      | 0.819        | 0.782             |
|                      |              | SE           | 0.590        | <b>&lt;0.0001</b> | <b>0.003</b>      | 0.467        | 0.703             |
|                      |              | SW           | 0.957        | <b>&lt;0.0001</b> | 0.109             | 1.000        | 0.540             |
|                      | SE           | NE           | 0.443        | <b>0.013</b>      | 0.762             | 0.624        | 0.926             |
|                      |              | NW           | 0.590        | <b>&lt;0.0001</b> | <b>0.003</b>      | 0.467        | 0.703             |
|                      |              | SW           | 0.628        | 0.690             | 0.164             | 0.463        | 0.812             |
|                      | SW           | NE           | 0.219        | <b>0.027</b>      | 0.274             | 0.818        | 0.748             |
|                      |              | NW           | 0.957        | <b>&lt;0.0001</b> | <b>0.109</b>      | 1.000        | 0.540             |
|                      |              | SE           | 0.628        | 0.690             | 0.164             | 0.463        | 0.812             |
| 1-2.5 $\mu\text{m}$  | NE           | NW           | 0.065        | <b>0.001</b>      | <b>0.042</b>      | 0.975        | 0.362             |
|                      |              | SE           | <b>0.003</b> | <b>0.038</b>      | 0.393             | 0.707        | 0.564             |

|                      |    |    |                   |                   |              |              |              |
|----------------------|----|----|-------------------|-------------------|--------------|--------------|--------------|
|                      | NW | SW | <b>0.004</b>      | 0.098             | 0.927        | 0.195        | 0.678        |
|                      |    | NW | 0.065             | <b>0.001</b>      | 0.042        | 0.975        | 0.362        |
|                      |    | SE | 0.240             | <b>&lt;0.0001</b> | <b>0.004</b> | 0.680        | 0.723        |
|                      | SE | SW | 0.292             | <b>&lt;0.0001</b> | 0.051        | 0.200        | 0.176        |
|                      |    | NE | <b>0.003</b>      | <b>0.038</b>      | 0.393        | 0.707        | 0.564        |
|                      |    | NW | 0.240             | <b>&lt;0.0001</b> | <b>0.004</b> | 0.680        | 0.723        |
|                      | SW | SW | 0.911             | 0.607             | 0.345        | 0.091        | 0.308        |
|                      |    | NE | <b>0.004</b>      | 0.098             | 0.927        | 0.195        | 0.678        |
|                      |    | NW | 0.292             | <b>&lt;0.0001</b> | 0.051        | 0.200        | 0.176        |
|                      |    | SE | 0.911             | 0.607             | 0.345        | 0.091        | 0.308        |
| 2.5-10 $\mu\text{m}$ | NE | NW | 0.140             | <b>0.020</b>      | 0.732        | <b>0.026</b> | <b>0.041</b> |
|                      |    | SE | <b>0.026</b>      | 0.367             | <b>0.002</b> | <b>0.035</b> | <b>0.025</b> |
|                      |    | SW | 0.349             | 0.426             | 0.090        | 0.422        | 0.068        |
|                      | NW | NW | 0.140             | <b>0.020</b>      | 0.732        | <b>0.026</b> | <b>0.041</b> |
|                      |    | SE | <b>&lt;0.0001</b> | 0.187             | <b>0.005</b> | 0.901        | 0.852        |
|                      |    | SW | 0.582             | 0.124             | 0.180        | 0.139        | 0.816        |
|                      | SE | NE | <b>0.026</b>      | 0.367             | <b>0.002</b> | <b>0.035</b> | <b>0.025</b> |
|                      |    | NW | <b>&lt;0.0001</b> | 0.187             | <b>0.005</b> | 0.901        | 0.852        |
|                      |    | SW | <b>0.002</b>      | 0.884             | 0.127        | 0.175        | 0.673        |
|                      | SW | NE | 0.349             | 0.426             | 0.090        | 0.422        | 0.068        |
|                      |    | NW | 0.582             | 0.124             | 0.180        | 0.139        | 0.816        |
|                      |    | SE | <b>0.002</b>      | 0.884             | 0.127        | 0.175        | 0.673        |
| >10 $\mu\text{m}$    | NE | NW | 0.881             | <b>0.003</b>      | 0.539        | 0.056        | 0.120        |
|                      |    | SE | <b>0.003</b>      | 0.952             | 0.008        | 0.068        | 0.100        |
|                      |    | SW | 0.582             | 1.000             | 0.268        | 0.701        | 0.234        |
|                      | NW | NW | 0.881             | <b>0.003</b>      | 0.539        | 0.056        | 0.120        |
|                      |    | SE | <b>0.002</b>      | <b>0.004</b>      | <b>0.001</b> | 0.928        | 0.936        |
|                      |    | SW | 0.479             | <b>0.003</b>      | 0.089        | 0.115        | 0.704        |
|                      | SE | NE | <b>0.003</b>      | 0.952             | <b>0.008</b> | 0.068        | 0.100        |
|                      |    | NW | <b>0.002</b>      | <b>0.004</b>      | <b>0.001</b> | 0.928        | 0.936        |
|                      |    | SW | <b>0.014</b>      | 0.952             | 0.109        | 0.137        | 0.642        |
|                      | SW | NE | 0.582             | 1.000             | 0.268        | 0.701        | 0.234        |
|                      |    | NW | 0.479             | 0.003             | 0.089        | 0.115        | 0.704        |
|                      |    | SE | <b>0.014</b>      | 0.952             | 0.109        | 0.137        | 0.642        |

**Table S3.** Results of one-way ANOVA performed of every three sampling height ranges(L, M and H) at sites T0-T4. Statistically significant differences ( $p < 0.05$ ) are highlighted in bold.

| dependent variable   | (I)height range | (J)height range | T0                | T1                | T2                | T3                | T4           |
|----------------------|-----------------|-----------------|-------------------|-------------------|-------------------|-------------------|--------------|
| SIRM                 | L               | M               | <b>0.019</b>      | <b>0.003</b>      | 0.970             | 0.059             | 0.722        |
|                      |                 | H               | <b>&lt;0.0001</b> | <b>&lt;0.0001</b> | 0.974             | 0.053             | 0.854        |
|                      | M               | L               | <b>0.019</b>      | <b>0.003</b>      | 0.970             | 0.059             | 0.722        |
|                      |                 | H               | <b>0.010</b>      | <b>0.043</b>      | 0.992             | 0.948             | 0.516        |
|                      | H               | L               | <b>&lt;0.0001</b> | <b>&lt;0.0001</b> | 0.974             | 0.053             | 0.854        |
|                      |                 | M               | <b>0.010</b>      | <b>0.043</b>      | 0.992             | 0.948             | 0.516        |
| weight               | L               | M               | <b>&lt;0.0001</b> | <b>&lt;0.0001</b> | 0.544             | 0.117             | 0.257        |
|                      |                 | H               | <b>&lt;0.0001</b> | <b>&lt;0.0001</b> | 0.407             | 0.550             | 0.544        |
|                      | M               | L               | <b>&lt;0.0001</b> | <b>&lt;0.0001</b> | 0.544             | 0.117             | 0.257        |
|                      |                 | H               | <b>0.001</b>      | <b>&lt;0.0001</b> | 0.826             | 0.217             | 0.491        |
|                      | H               | L               | <b>&lt;0.0001</b> | <b>&lt;0.0001</b> | 0.407             | 0.550             | 0.544        |
|                      |                 | M               | <b>0.001</b>      | <b>&lt;0.0001</b> | 0.826             | 0.217             | 0.491        |
| 0.02-1 $\mu\text{m}$ | L               | M               | 0.813             | 0.357             | 0.356             | 0.096             | <b>0.045</b> |
|                      |                 | H               | <b>0.023</b>      | <b>0.093</b>      | 0.378             | <b>0.001</b>      | <b>0.011</b> |
|                      | M               | L               | 0.813             | 0.357             | 0.356             | 0.096             | <b>0.045</b> |
|                      |                 | H               | <b>0.002</b>      | 0.401             | 0.917             | 0.081             | 0.618        |
|                      | H               | L               | <b>0.023</b>      | 0.093             | 0.378             | <b>0.001</b>      | <b>0.011</b> |
|                      |                 | M               | <b>0.002</b>      | 0.401             | 0.917             | 0.081             | 0.618        |
| 1-2.5 $\mu\text{m}$  | L               | M               | 0.635             | <b>0.031</b>      | 0.837             | <b>0.016</b>      | 0.054        |
|                      |                 | H               | 0.061             | <b>0.017</b>      | 0.153             | <b>&lt;0.0001</b> | <b>0.027</b> |
|                      | M               | L               | 0.635             | <b>0.031</b>      | 0.837             | <b>0.016</b>      | 0.054        |
|                      |                 | H               | <b>0.003</b>      | 0.852             | 0.058             | 0.057             | 0.834        |
|                      | H               | L               | 0.061             | <b>0.017</b>      | 0.153             | <b>&lt;0.0001</b> | <b>0.027</b> |
|                      |                 | M               | <b>0.003</b>      | 0.852             | 0.058             | 0.057             | 0.834        |
| 2.5-10 $\mu\text{m}$ | L               | M               | 0.282             | <b>0.001</b>      | <b>0.005</b>      | <b>0.013</b>      | 0.840        |
|                      |                 | H               | <b>0.023</b>      | <b>&lt;0.0001</b> | <b>&lt;0.0001</b> | <b>&lt;0.0001</b> | 0.171        |
|                      | M               | L               | 0.282             | <b>0.001</b>      | <b>0.005</b>      | <b>0.013</b>      | 0.840        |
|                      |                 | H               | 0.146             | <b>&lt;0.0001</b> | <b>0.001</b>      | <b>0.047</b>      | 0.173        |
|                      | H               | L               | <b>0.023</b>      | <b>&lt;0.0001</b> | <b>&lt;0.0001</b> | <b>&lt;0.0001</b> | 0.171        |
|                      |                 | M               | 0.146             | <b>&lt;0.0001</b> | <b>0.001</b>      | <b>0.047</b>      | 0.173        |
| >10 $\mu\text{m}$    | L               | M               | 0.448             | <b>0.003</b>      | 0.055             | <b>0.002</b>      | 0.881        |
|                      |                 | H               | <b>0.004</b>      | <b>&lt;0.0001</b> | <b>&lt;0.0001</b> | <b>&lt;0.0001</b> | 0.571        |
|                      | M               | L               | 0.448             | <b>0.003</b>      | 0.055             | <b>0.002</b>      | 0.881        |
|                      |                 | H               | <b>0.009</b>      | <b>0.012</b>      | <b>0.004</b>      | <b>0.040</b>      | 0.392        |
|                      | H               | L               | <b>0.004</b>      | <b>&lt;0.0001</b> | <b>&lt;0.0001</b> | <b>&lt;0.0001</b> | 0.571        |
|                      |                 | M               | <b>0.009</b>      | <b>0.012</b>      | <b>0.004</b>      | <b>0.040</b>      | 0.392        |
